# Supplementary material for: Pituitary Actions of EGF on Gonadotropins, Growth Hormone, Prolactin and Somatolactins in Grass Carp
Source: MDPI journal article supplement (doi:10.3390/biology9090279), 2020-09-08
Supplement: s2 [file s2]

## Supplemental Methods

### Experiment 1#: Receptor specificity of EGF-induced/reduced GH, PRL, SL $\alpha$ /SL $\beta$ and LH $\beta$ mRNA expression in grass carp pituitary cells.

In this experiment, grass carp pituitary cells were incubated with EGF (50 nM), AG1478 (5  $\mu$ M), EGF (50nM) + AG1478 (5  $\mu$ M), AG879 (5 $\mu$ M), or EGF (50nM) + AG879 (5  $\mu$ M), respectively. For the cotreatment of EGF and EGFR inhibitors, grass carp pituitary cells were firstly pretreated with EGF receptor inhibitor AG1478 (5  $\mu$ M) or AG879 (5  $\mu$ M) for 30 min, respectively. Then, grass carp pituitary cells were treated with EGF (50 nm) together. After 48 h treatment, the cells were collected with 500  $\mu$ L/well Trizol (Invitrogen, Carlsbad, CA, USA) to extract the total RNA and reversely transcribed by Hifair<sup>TM</sup> III 1<sup>st</sup> Strand cDNA Synthesis Kit (gDNA digester plus) (Yeasen Biotech, Shanghai, China). Finally, the RT samples were subject to qPCR using ABI 7500 real time PCR system (Applied Biosystems, USA) to detect the mRNA expression of grass carp GH, PRL, SL $\alpha$ /SL $\beta$  and LH $\beta$  with specific primer, respectively.

### Experiment 2#: Signal transduction of EGF-induced/reduced GH, PRL, SL $\alpha$ /SL $\beta$ and LH $\beta$ mRNA expression in grass carp pituitary cells.

In the experiment, similarly, the pharmacological blockers targeting different signal pathways, including PI3K/AKT/mTOR pathway and MEK1/2/ERK1/2 pathway were pretreated with grass carp pituitary cells for 30 min, respectively. And then, each well was added the EGF (50 nM) to treat the grass carp pituitary cells together. After 48h treatment, total RNA was extracted from each well by Trizol reagent and reversely transcribed by Hifair<sup>TM</sup> III 1<sup>st</sup> Strand cDNA Synthesis Kit (gDNA digester plus) (Yeasen Biotech, Shanghai, China). Finally, ABI 7500 real-time PCR system was conducted to detect the mRNA transcription of GH, PRL, SL $\alpha$ /SL $\beta$  and LH $\beta$  with specific primers, respectively.

### Experiment 3#: Western blot for signaling kinases

In this experiment, grass carp pituitary cells were treated with or without EGF for 30 min based on time course validation. After drug treatment, the cell medium was discarded from individual well and the pituitary cells were rinsed with PBS. The pituitary cells were lysed in RIPA buffer (50 mM Tris. HCl, 150 mM NaCl, 1 mM EDTA, 1% NP-40, and 0.25% Na deoxycholate) containing a final concentration of 1  $\times$  protease/phosphatase inhibitor cocktail (Roche). After that, the cells lysate was centrifuged by 12000 $\times$ g at 4  $^{\circ}$ C, and the supernatant were collected. Using the antibodies of p-ERK (1:5,000), t-ERK (1:1,000), p-AKT (1:1,000) and t-AKT (1:1,000) to detected the phosphorylation. The dilutions of these antibodies were recommended by the manufactures. After the incubation with antibodies respectively, the membranes were washed three times to remove non-specific binding of primary antibodies and the HRP-conjugated secondary antibodies [goat anti-rabbit IgG (1:5,000)] were used for signal development. Finally, using SuperSignal West Pico (PIERCE, Rockford) as the substrate and quantified using the IC440 CF Digital Science Image Station (Eastman Kodak) to detect the Chemiluminescence signals for target immune-reactivity. In these experiments, Western blot of  $\beta$ -actin was used as an internal control using its antibody (1:15,000; Oncogen, Cambridge, MA).

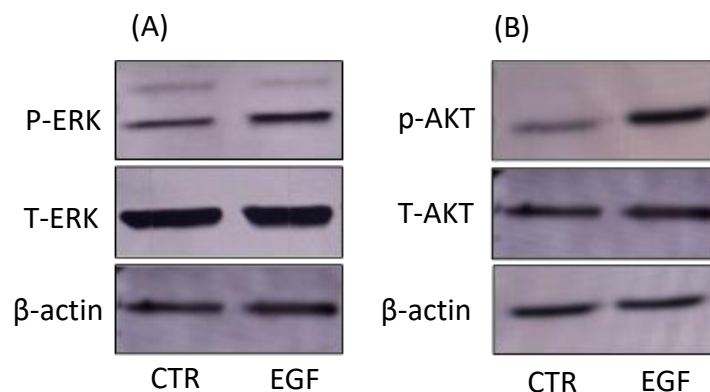

**Figure S1.** EGF-induced protein phosphorylation of ERK and AKT. The grass carp pituitary cells were treated with 50nM EGF for 30 min. After that, cell lysate was prepared for Western blot by using the antibody for phosphorylated ERK and total ERK (A) and phosphorylated AKT and total AKT (B), respectively. Parallel blotting of  $\beta$ -actin was used as an internal control.

**Table S1.** The information for the drugs used in receptor specificity and signal transduction.

| Item       | Function         | Manufacture       | Cat. No.  |
|------------|------------------|-------------------|-----------|
| AG1478     | ErbB1 inhibitor  | MCE               | HY-13524  |
| AG879      | ErbB2 inhibitor  | MCE               | HY-20878  |
| U0126      | MEK1/2 inhibitor | MCE               | HY-12031  |
| LY3214996  | ERK1/2 inhibitor | MCE               | HY-101494 |
| Wortmannin | PI3K inhibitor   | MCE               | HY-10197  |
| MK 2206    | AKT inhibitor    | MCE               | HY-10358  |
| Rapamycin  | mTOR inhibitor   | MCE               | S1039     |
| GR64349    | NK2R agonist     | Tocris Bioscience | 1668      |
| GR159897   | NK2R antagonist  | Tocris Bioscience | 1274      |
| Forskolin  | AC activator     | Sigma             | F6886     |

**Table S2.** Primers used for quantitative real-time PCR.

| qPCR Primers   | Forward Primer            | Reverse Primer           | Length | Annealin T <sub>m</sub> | Acc. No. |
|----------------|---------------------------|--------------------------|--------|-------------------------|----------|
| LH $\beta$     | ACATCCTCCTTCTCTTATTCTG    | CAAGCGGACCGTCTCATAG      | 230    | 60°C                    | EF565171 |
| FSH $\beta$    | TTCGTTGTTATGGTGATGCT      | CGTGAAAACCGAGTCAGTCC     | 310    | 58°C                    | EF194762 |
| GTH $\alpha$   | GATATGACTAACTTTGGATGTG    | TAGTAACAGGTGCTACAGTGG    | 263    | 52°C                    | EU095936 |
| GH             | GTGGTGCTGGTTAGTTTGTGG     | CTTCAACATAGAGCTCTTCTG    | 252    | 54°C                    | AY616661 |
| PRL            | CTCAGCACCTCTCTCACCAATGACC | GCGGAAGCAGGACAACAGAAAATG | 400    | 60°C                    | EU074210 |
| SL $\alpha$    | ACCCACTGTACTTCAATCTCC     | CGTCGTAACGATCAAGAGTAG    | 283    | 52°C                    | EF372074 |
| SL $\beta$     | TGTTTGAGGAGATGCTCGTTT     | CCACCGTCACCCAATATCTGT    | 289    | 52°C                    | EF372075 |
| $\beta$ -Actin | CTGGTATCGTGATGGACTCT      | AGCTCATAGCTCTTCTCCAG     | 280    | 56°C                    | M25013   |

**Table S3.** Antibodies used in fluorescence immunoassay.

| Protein Target | Antigen and Source of Sequence Information           | Name of Antibody        | Name of Individual Providing the Antibody   | Species for Raising Antibody/Application |
|----------------|------------------------------------------------------|-------------------------|---------------------------------------------|------------------------------------------|
| grass carp PRL | Recombinant grass carp PRL (GenBank EF565171)        | grass carp PRL antibody | Dr. Hu GF, Huazhong Agricultural University | Polyclonal in Rabbit                     |
| grass carp GH  | Recombinant grass carp GH (GenBank EF552359)         | grass carp GH antibody  | Dr. Hu GF, Huazhong Agricultural University | Polyclonal in Rabbit                     |
| grass carp LH  | Recombinant grass carp LH $\beta$ (GenBank EF565171) | grass carp LH antibody  | Dr. Hu GF, Huazhong Agricultural University | Polyclonal in Rabbit                     |

**Table S4.** The effects of EGF on pituitary hormones at 24h by transcriptome analysis. Fragments per kilobase of exon per million fragments mapped (FPKM), Fold Change (FC).

| Gene name                     | CTR_(fpkm) | EGF_(fpkm) | FC       | p-value                |
|-------------------------------|------------|------------|----------|------------------------|
| <i>GH</i>                     | 291581.5   | 267422.2   | 0.917144 | $5.89 \times 10^{-1}$  |
| <i>PRL</i>                    | 16916.15   | 31527.79   | 1.863769 | $1.09 \times 10^{-51}$ |
| <i>SL<math>\alpha</math></i>  | 8960.87    | 16417.36   | 1.832117 | $2.80 \times 10^{-49}$ |
| <i>SL<math>\beta</math></i>   | 792.78     | 818.17     | 1.032027 | $4.50 \times 10^{-2}$  |
| <i>GtH<math>\alpha</math></i> | 43405.87   | 37831.61   | 0.871578 | $9.36 \times 10^{-2}$  |
| <i>LH<math>\beta</math></i>   | 813.94     | 746.03     | 0.916566 | $6.08 \times 10^{-1}$  |
| <i>FSH<math>\beta</math></i>  | 236.6      | 214.39     | 0.906128 | 5.26E-01               |
